# Supplementary material for: Improving the Gross Primary Production Estimate by Merging and Downscaling Based on Deep Learning
Source: MDPI journal article supplement (doi:10.3390/f14061201), 2023-06-09
Supplement: s1 [file s1]

## Supplementary Materials

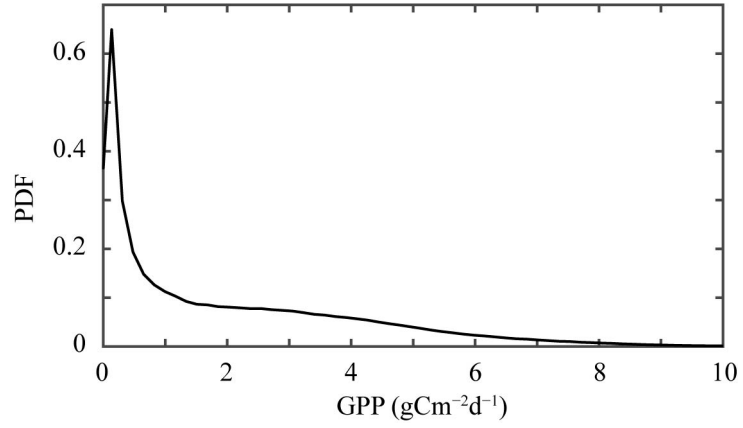

**Figure S1.** The probability density distribution of GLASS GPP during 1982-2014.

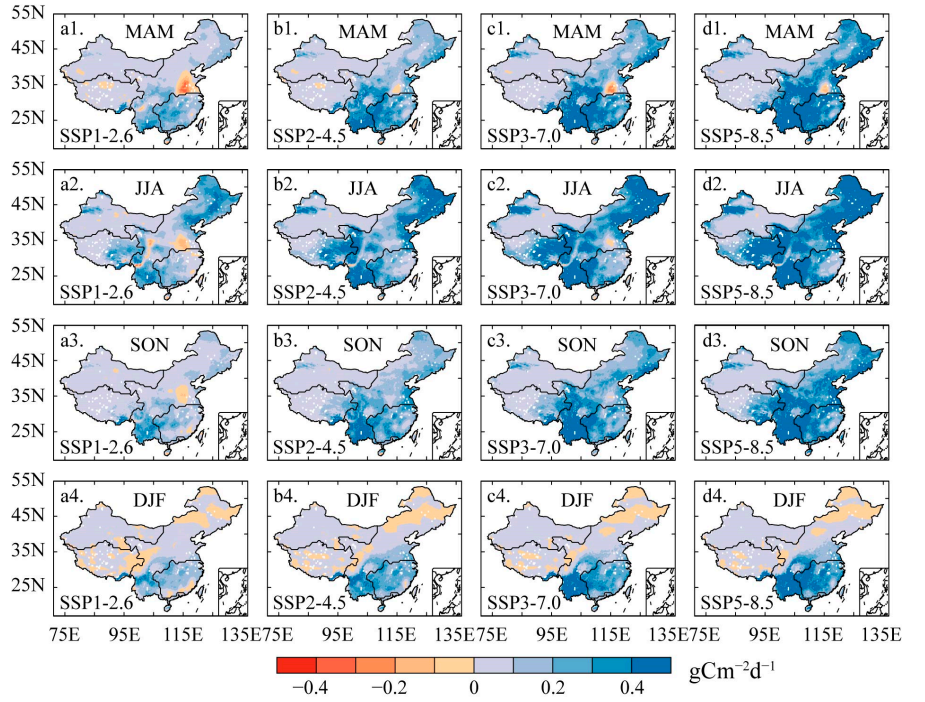

**Figure S2.** Spatial distribution of the multi-annual mean GPP in the far future (2071-2100) relative to baseline under (a1-a4) SSP 1-2.6, (b1-b4) SSP2-4.5, (c1-c4) SSP 3-7.0, (d1-d4) SSP 5-8.5 in (a1-d1) MAM, (a2-d2) JJA, (a3-d3) SON, and (a4-d4) DJF.

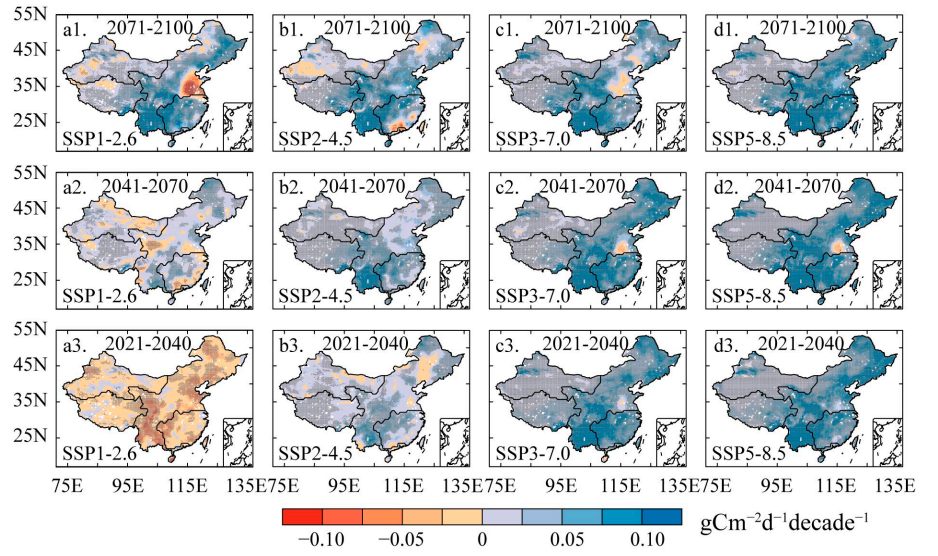

**Figure S3.** Spatial distribution of the variation trends of annual average GPP under four climate scenarios in near, middle and far future, with the dot indicating passing significance test at 5% level.
